# Supplementary material for: Network analysis of temporal functionalities of the gut induced by perturbations in new-born piglets
Source: PubMed Central journal article supplement (PMC4518884; doi:10.1186/s12864-015-1733-8), 2015-07-29

**GRB2**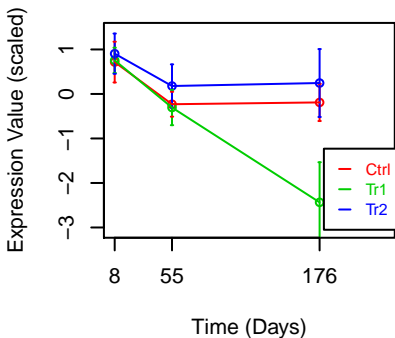**STAT3**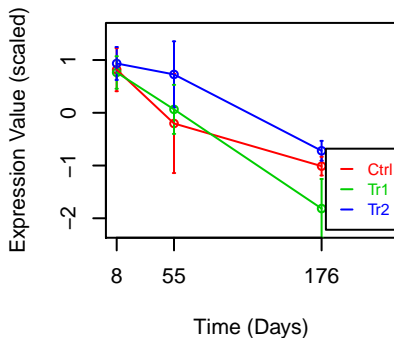**CDC42**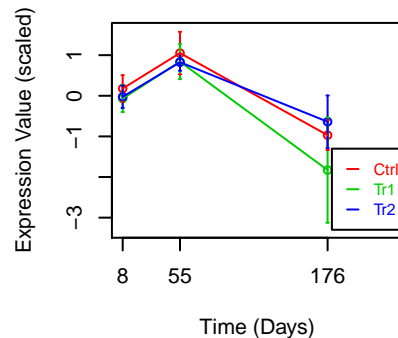**CAV1**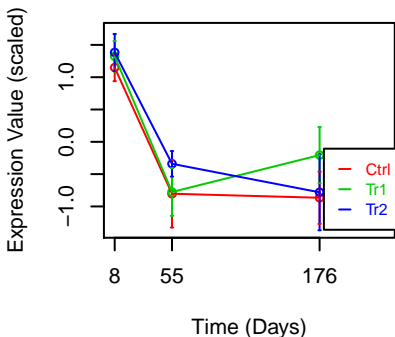**FOS**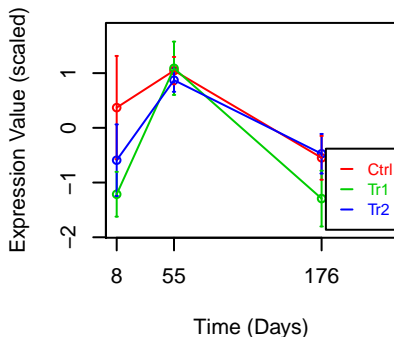**MYC**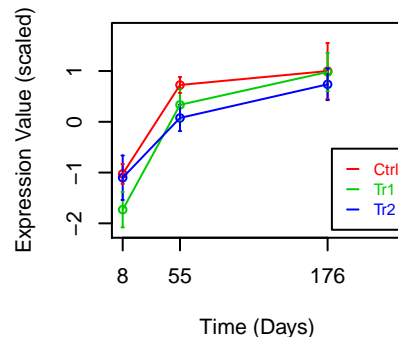**MAPK14**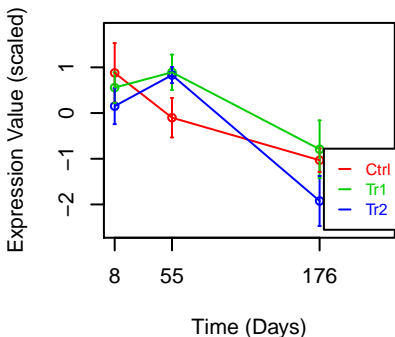**RELA**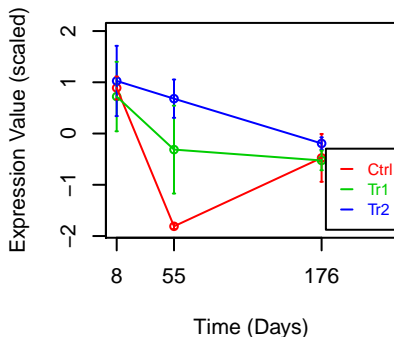**UBE2D2**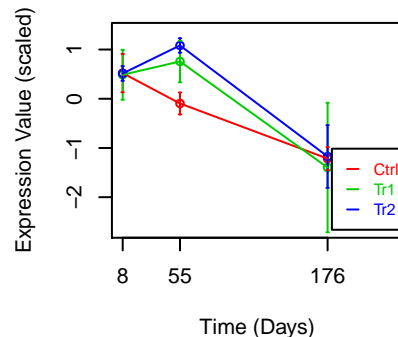

### ITCH

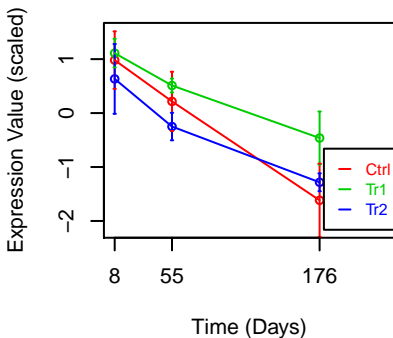

### IKBKG

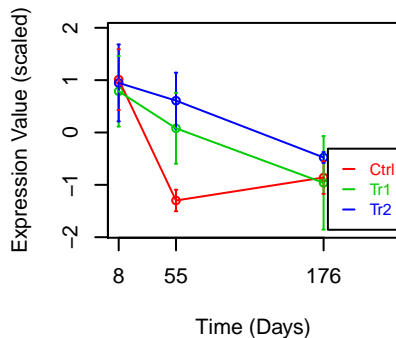

### SP1

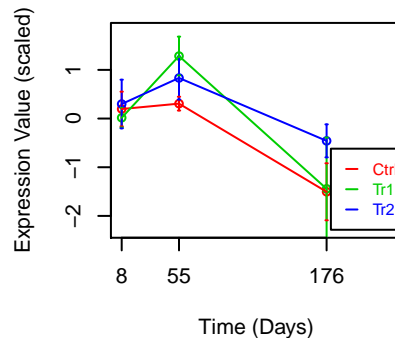

### RHOA

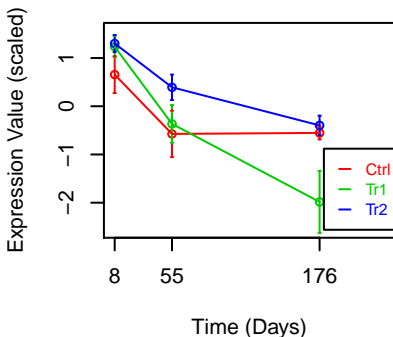

### RPS3

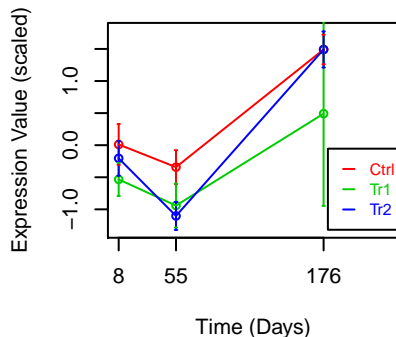

### FBXW7

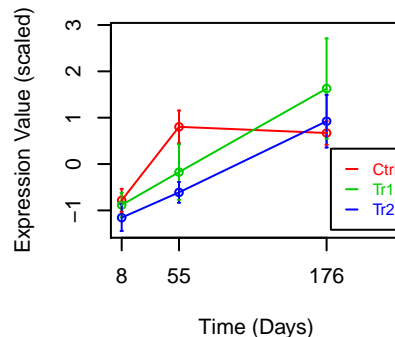

### UBA52

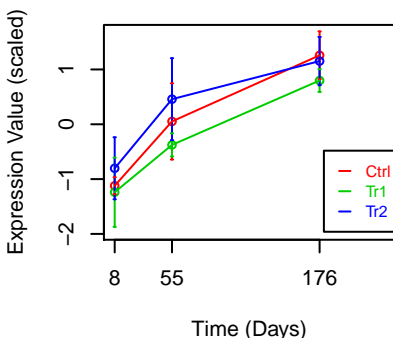

### STAT1

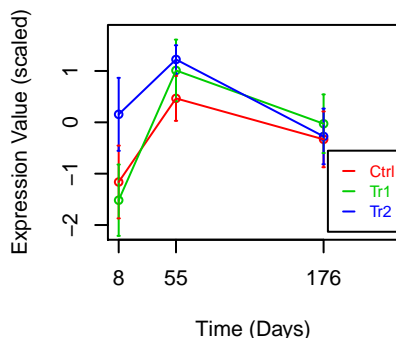

Supplement: 12864_2015_1733_MOESM4_ESM.pdf [file 12864_2015_1733_MOESM4_ESM.pdf]
