# Supplementary material for: Network analysis of temporal functionalities of the gut induced by perturbations in new-born piglets
Source: PubMed Central journal article supplement (PMC4518884; doi:10.1186/s12864-015-1733-8), 2015-07-29

### Eubacterium.et.rel.

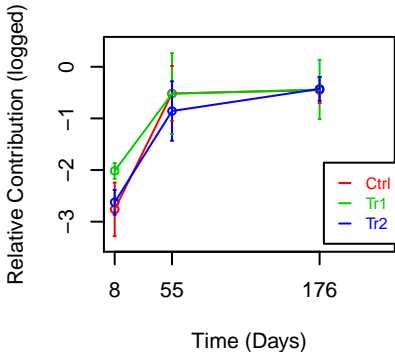

### Ruminococcus.bromii.et.rel.

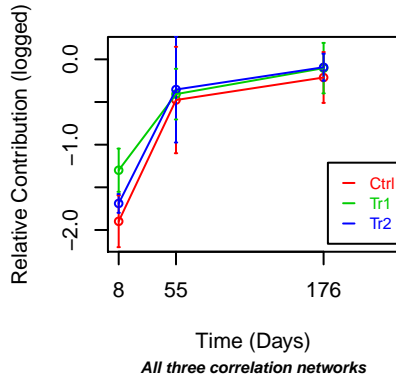

### Faecalibacterium.et.rel.

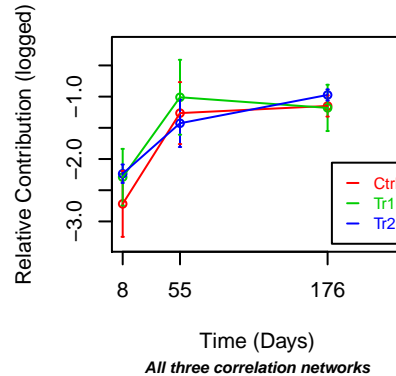

### Campylobacter

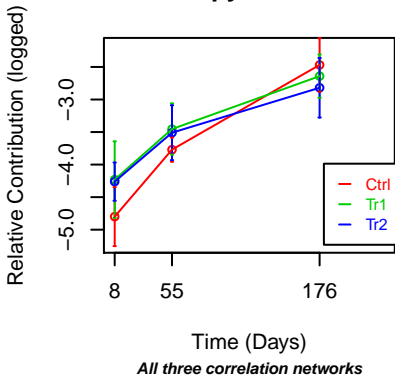

### Lawsonia.intracellularis.et.rel.

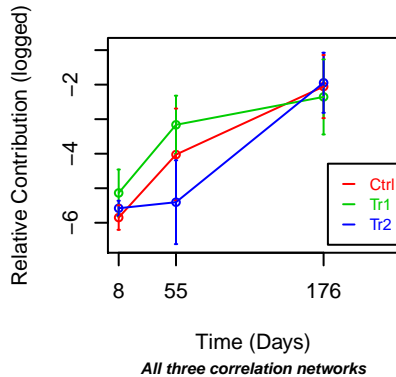

### Butyrivibrio.crossotus.et.rel.

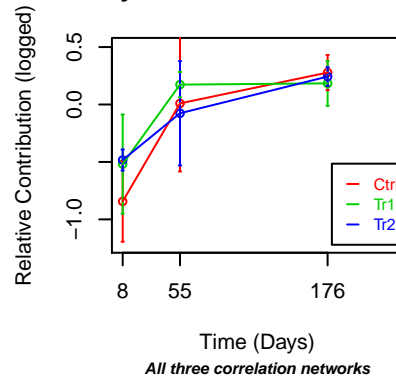

### Bacteroides.distasonis.et.rel.

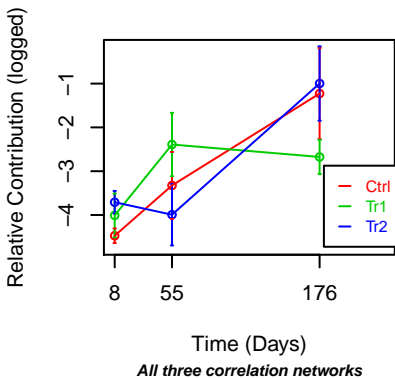

### Fusobacterium.et.rel.

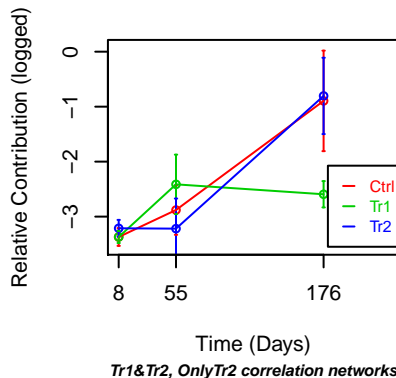

### Eubacterium.hallii.et.rel.

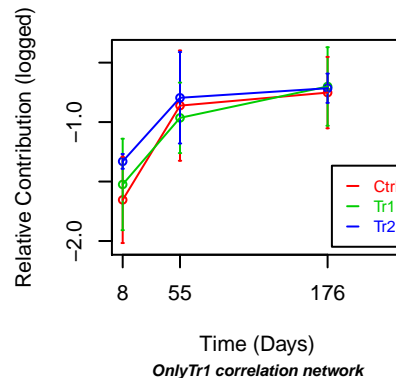

### Roseburia.intestinalis.et.rel.

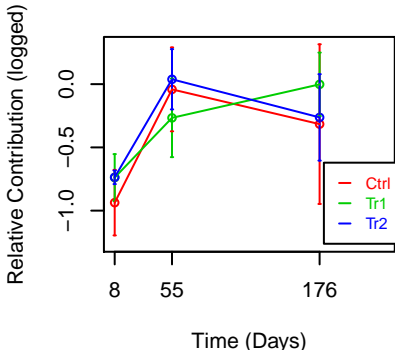

### Coprococcus.eutactus.et.rel.

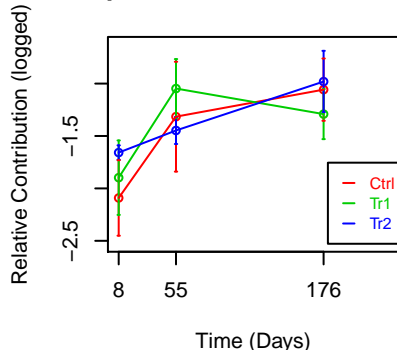

### Brachyspira

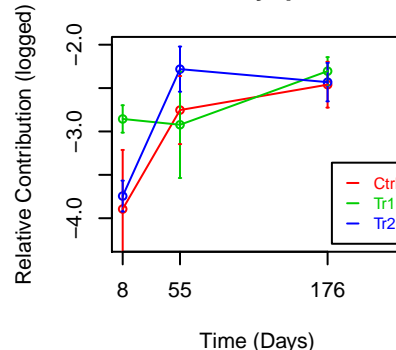

### Eubacterium.biforme.et.rel.

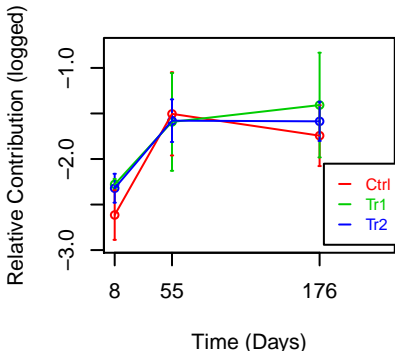

### Catenibacterium.et.rel.

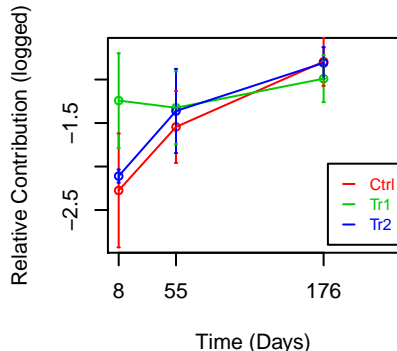

### Turneriella

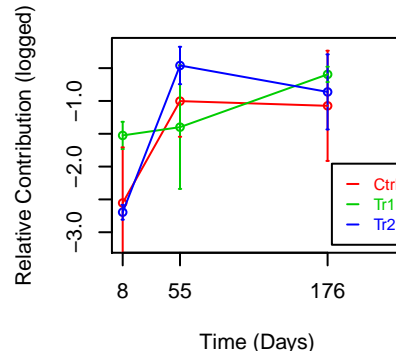

### Bordetella.et.rel.

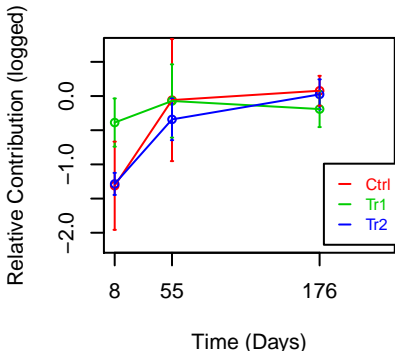

### Erysipelothrix

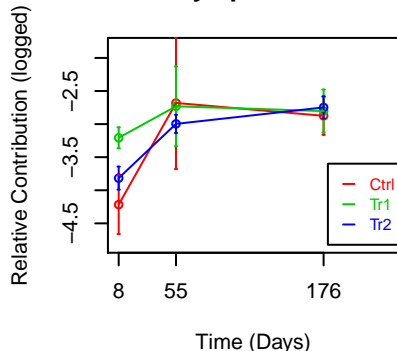

### Lactobacillus.acidophilus.et.rel.

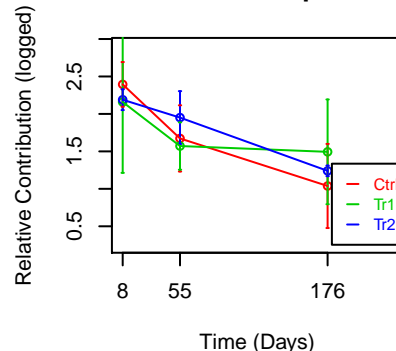

### Desulfovibrio.et.rel.

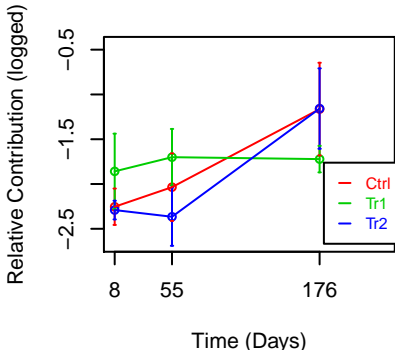

### Uncultured.Prevotella

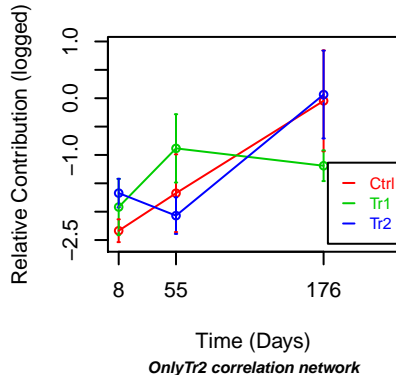

### Oxalobacter.et.rel.

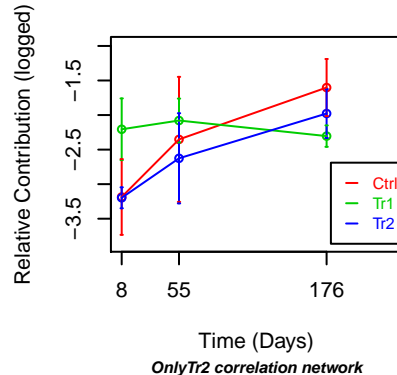

### Thiocapsa.et.rel.

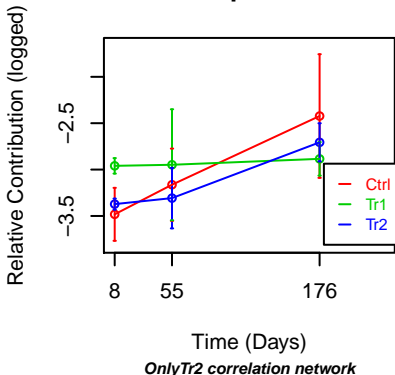

### Acinetobacter.et.rel.

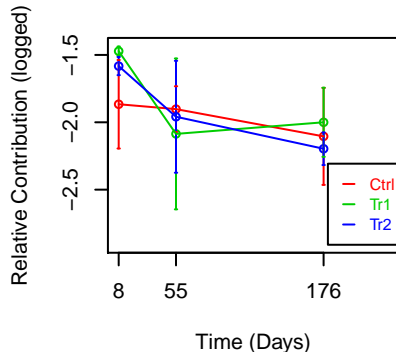

### Allofustis.et.rel.

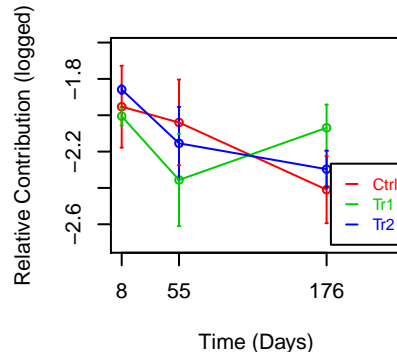

### Anaerovorax.et.rel.

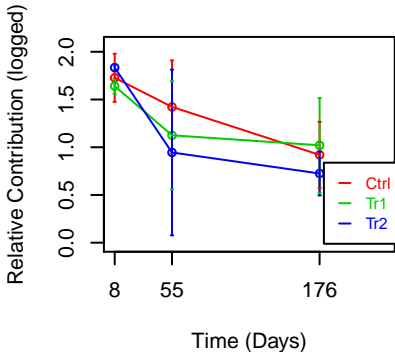

### Caulobacter.et.rel.

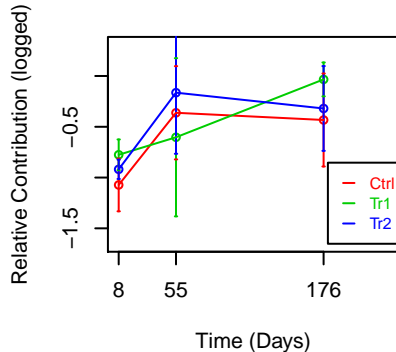

### Clostridium.lactifermentans.et.rel.

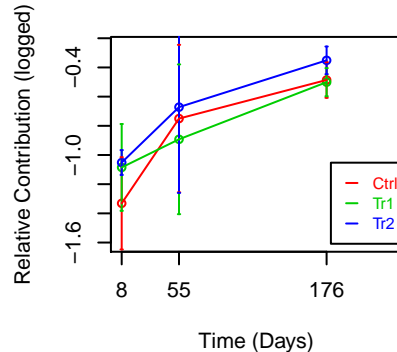

**Clostridium.oroticum.et.rel.**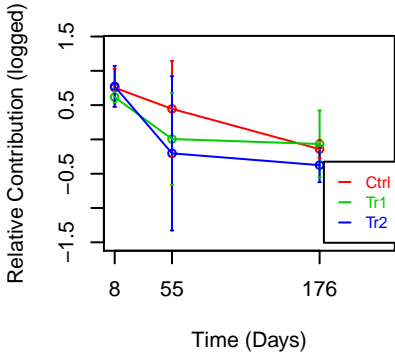**Clostridium.sphenoides.et.rel.**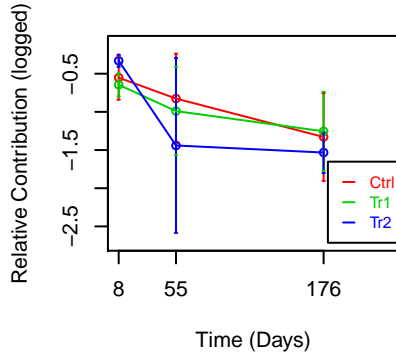**Eggerthella.et.rel.**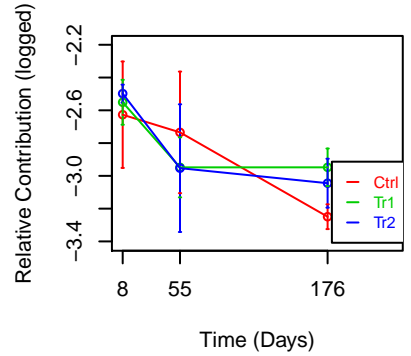**Eubacterium.cellulosi.et.rel.**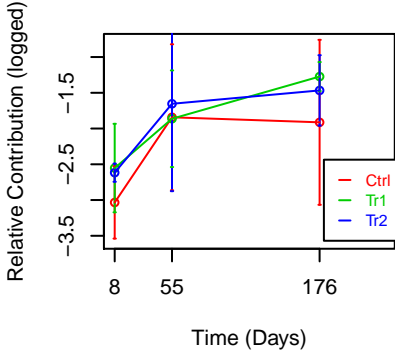**Eubacterium.pyruvativorans.et.re**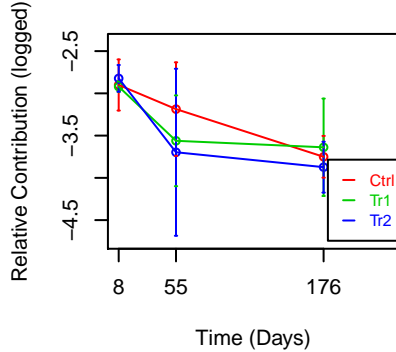**Halomonas.et.rel.**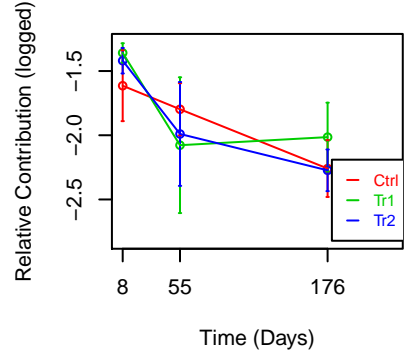**Ignatzschineria.et.al.**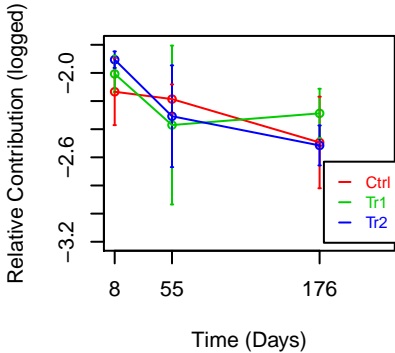**Lachnobacillus.bovis.et.rel.**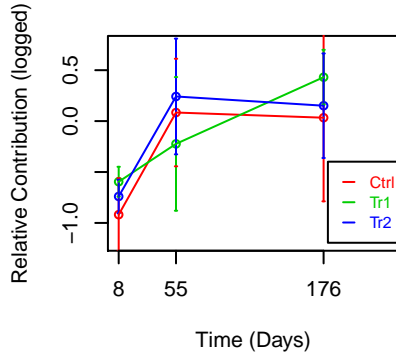**Lactobacillus.delbrueckii.et.rel.**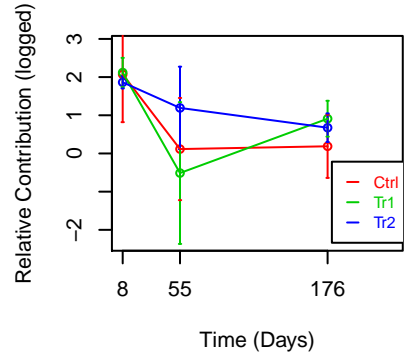

**Lactobacillus.paracasei.et.rel.**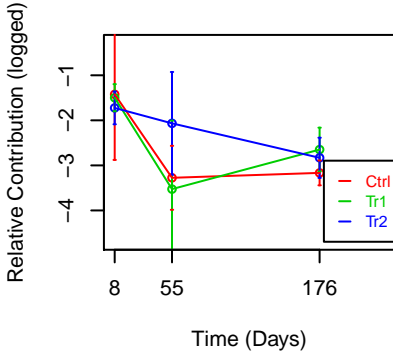**Mycoplasma**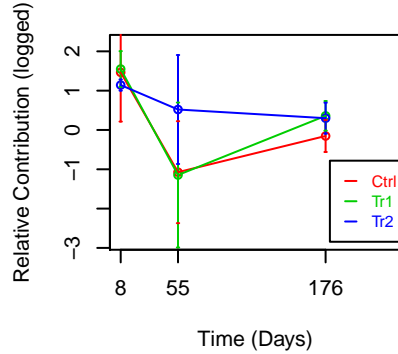**Neisseria.et.rel.**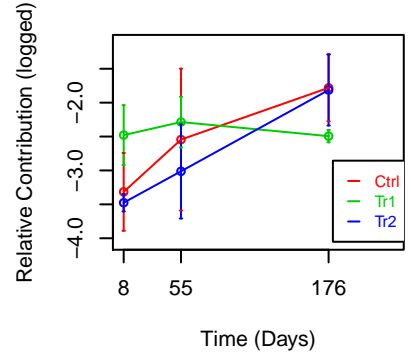**Oceanospirillum.et.rel.**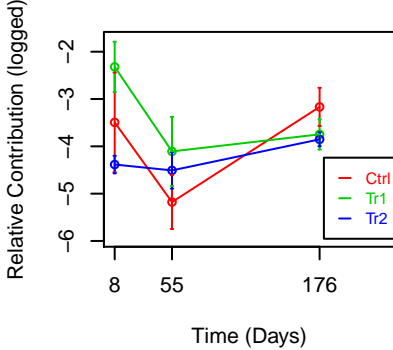**Pasteurella.et.rel.**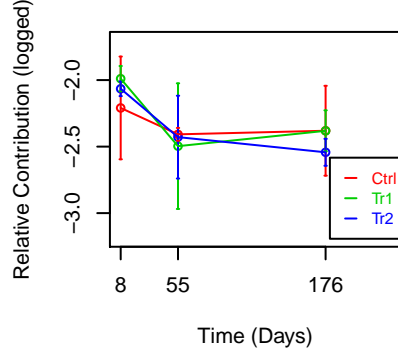**Prevotella.melaninogenica.et.rel.**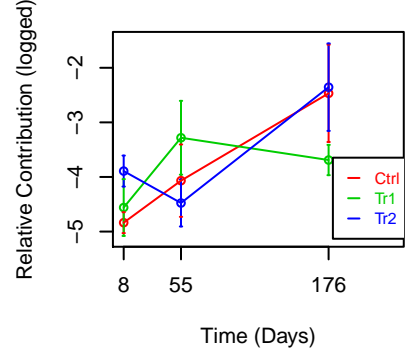**Sporobacter.termitidis.et.rel.**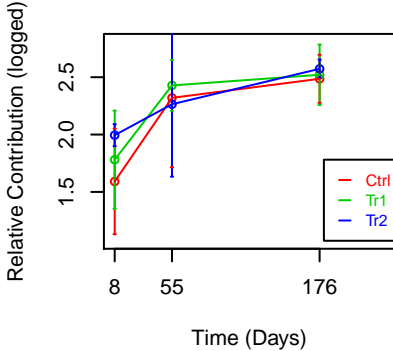**Staphylococcus.aureus.et.rel.**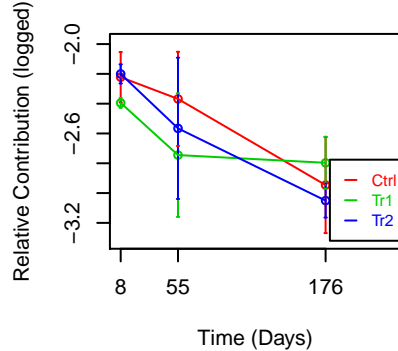**Turicibacter.et.rel.**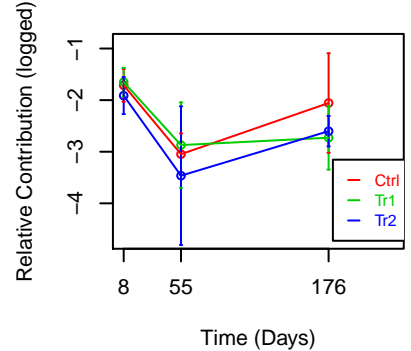

# Uncultured.Betaproteobacteria

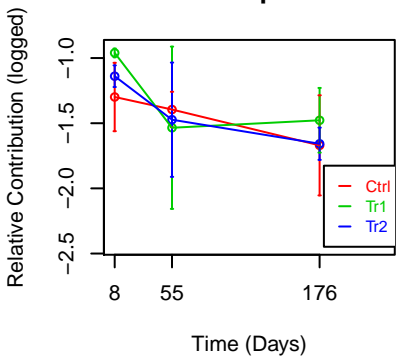

Supplement: 12864_2015_1733_MOESM6_ESM.pdf [file 12864_2015_1733_MOESM6_ESM.pdf]
